# Supplementary material for: Runx/Cbfβ complexes protect group 2 innate lymphoid cells from exhausted-like hyporesponsiveness during allergic airway inflammation
Source: PubMed Central journal article supplement (PMC6347616; doi:10.1038/s41467-019-08365-0), 2019-01-25
Supplement: 41467_2019_8365_MOESM1_ESM.pdf [file 41467_2019_8365_MOESM1_ESM.pdf]

**Runx/Cbf $\beta$  complexes protect group 2 innate lymphoid cells from exhausted-like hyporesponsiveness during allergic airway inflammation**

Miyamoto C, et al.

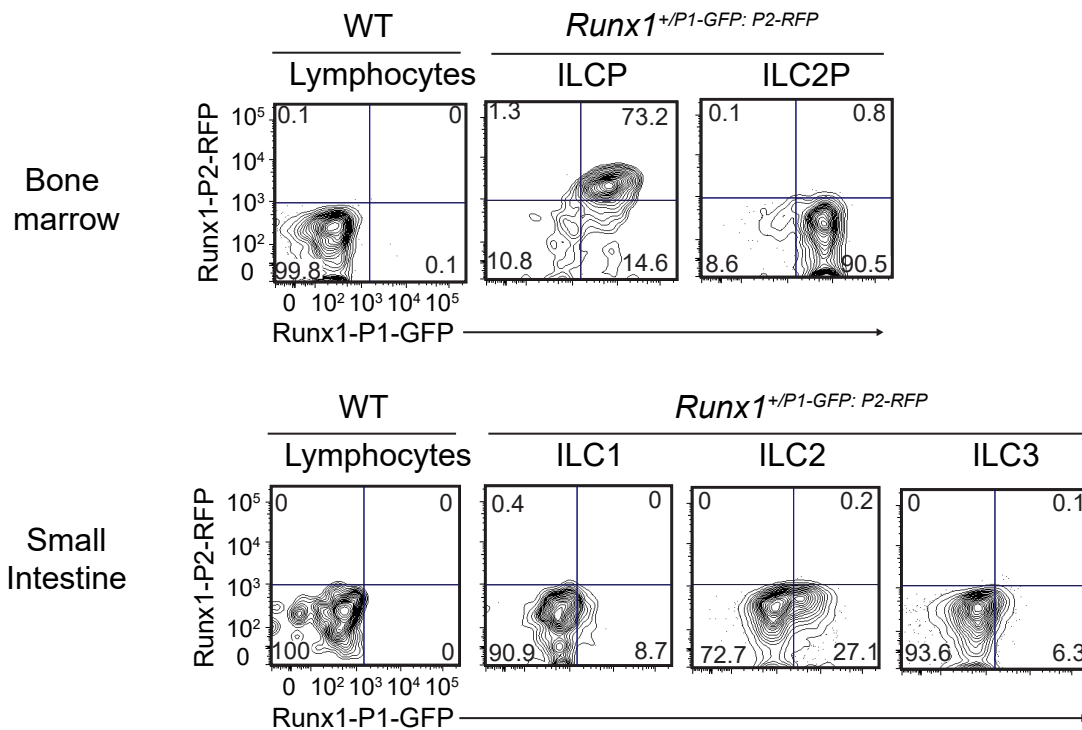

**Supplementary Figure 1.** Runx1 expression by ILC progenitors and ILCs. Flow cytometry analysis of the Runx1-GFP expression from the P1 promoter and the Runx1-RFP expression from the P2 promoter by ILCPs (CD45<sup>+</sup> Lin<sup>-</sup> cKit<sup>+</sup> CD127<sup>+</sup>  $\alpha$ 4 $\beta$ 7<sup>+</sup> PD-1<sup>+</sup>) and ILC2Ps (CD45<sup>+</sup> Lin<sup>-</sup> CD127<sup>+</sup>  $\alpha$ 4 $\beta$ 7<sup>+</sup> Flt3<sup>-</sup> CD25<sup>+</sup>) in the bone marrow, by ILC1s (CD45<sup>+</sup> CD3<sup>-</sup> CD19<sup>-</sup> NK1.1<sup>+</sup> NKp46<sup>+</sup> CD127<sup>+</sup>), ILC2s (CD45<sup>+</sup> CD3<sup>-</sup> CD19<sup>-</sup> NK1.1<sup>-</sup> CD127<sup>+</sup> KLRG1<sup>+</sup>) and ILC3s (CD45<sup>+</sup> CD3<sup>-</sup> CD19<sup>-</sup> NK1.1<sup>-</sup> KLRG1<sup>-</sup> CD127<sup>+</sup>) in the small intestine, and by lymphocytes in the indicated tissues of wild type mice. Numbers indicate percent cells in each quadrant. Data are representative of at least two independent experiments.

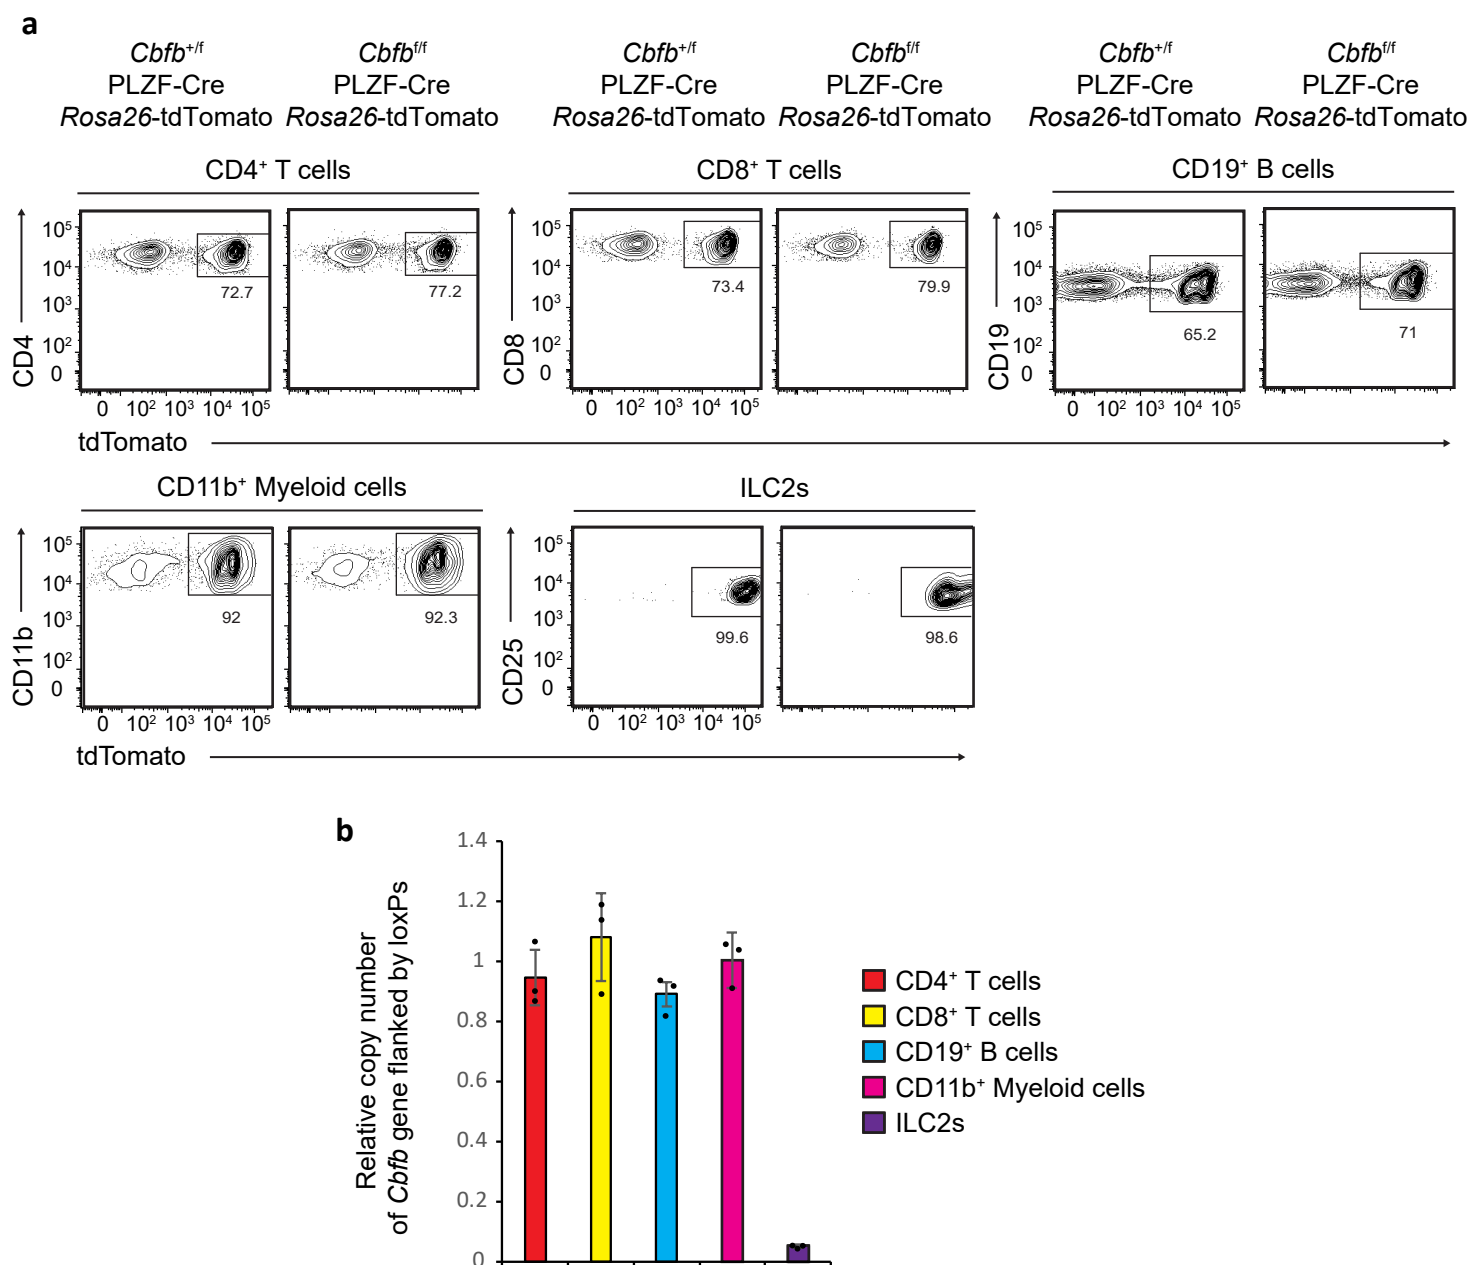

**Supplementary Figure 2.** *Cbfb* locus flanked by loxPs is well conserved in the major hematopoietic cells fate-mapped by PLZF expression. **a** Flow cytometry analysis of the tdTomato expression by CD4<sup>+</sup> T cells (CD3<sup>+</sup> CD4<sup>+</sup>), CD8<sup>+</sup> T cells (CD3<sup>+</sup> CD8<sup>+</sup>), CD19<sup>+</sup> B cells (CD3<sup>-</sup> CD19<sup>+</sup>), and CD11b<sup>+</sup> myeloid cells (CD11b<sup>+</sup> NK1.1<sup>-</sup>) in the spleen; and by ILC2s (CD45<sup>+</sup> CD3<sup>-</sup> CD19<sup>-</sup> NK1.1<sup>-</sup> CD127<sup>+</sup> ST2<sup>+</sup> CD25<sup>+</sup>) in the lung of the indicated mice.

**b** Quantitative PCR analysis for relative copy number of *Cbfb* gene flanked by loxPs in the indicated tdTomato<sup>+</sup> cells of *Cbfb*<sup>/*fl*</sup> PLZF-Cre *Rosa26*-tdTomato mice compared to those in the tdTomato<sup>-</sup> cells of *Cbfb*<sup>+/*fl*</sup> PLZF-Cre *Rosa26*-tdTomato mice for CD4<sup>+</sup> T cells, CD8<sup>+</sup> T cells, CD19<sup>+</sup> B cells, and CD11b<sup>+</sup> myeloid cells, and to tdTomato<sup>+</sup> ILC2s of *Cbfb*<sup>+/*fl*</sup> PLZF-Cre *Rosa26*-tdTomato mice for lung ILC2 cells. Numbers indicate percent cells in each box. Data are representative of at least two independent experiments (mean ± s.d. of three biological replicates in **b**).

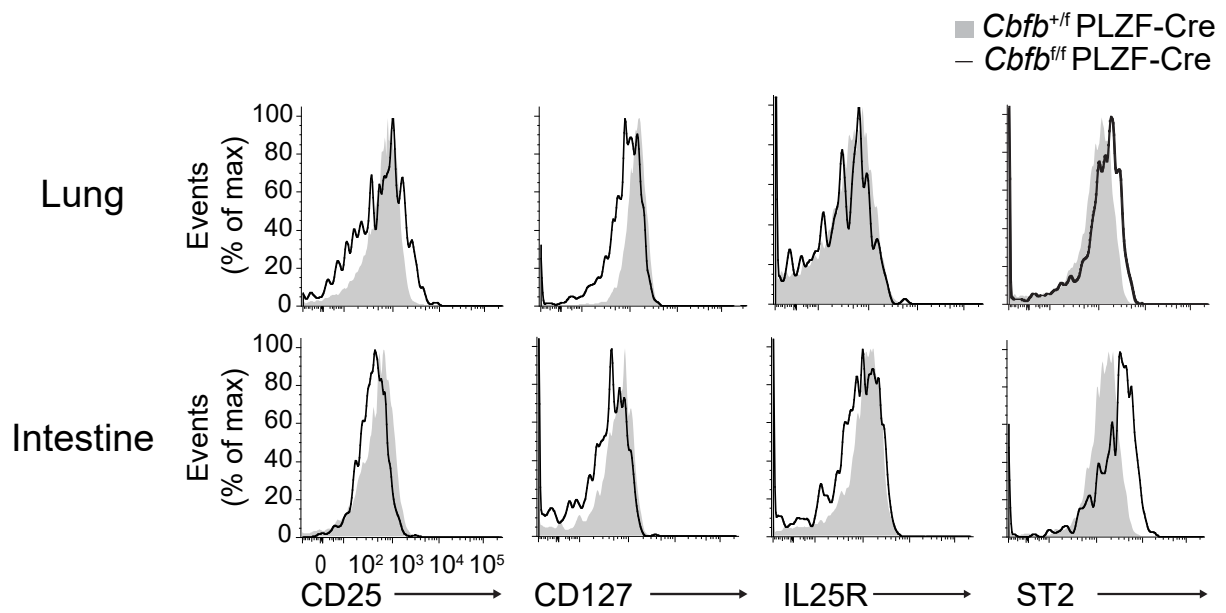

**Supplementary Figure 3.** Expression of cytokine receptors by *Cbfb*-deficient ILC2s. Flow cytometry analysis of the indicated proteins on ILC2s (CD45<sup>+</sup> CD3<sup>-</sup> CD19<sup>-</sup> CD127<sup>+</sup> GATA-3<sup>Hi</sup>) from lung (top) and intestine (bottom) of *Cbfb*<sup>+/f</sup> PLZF-Cre or *Cbfb*<sup>ff</sup> PLZF-Cre mice. Data are representative of at least two independent experiments.

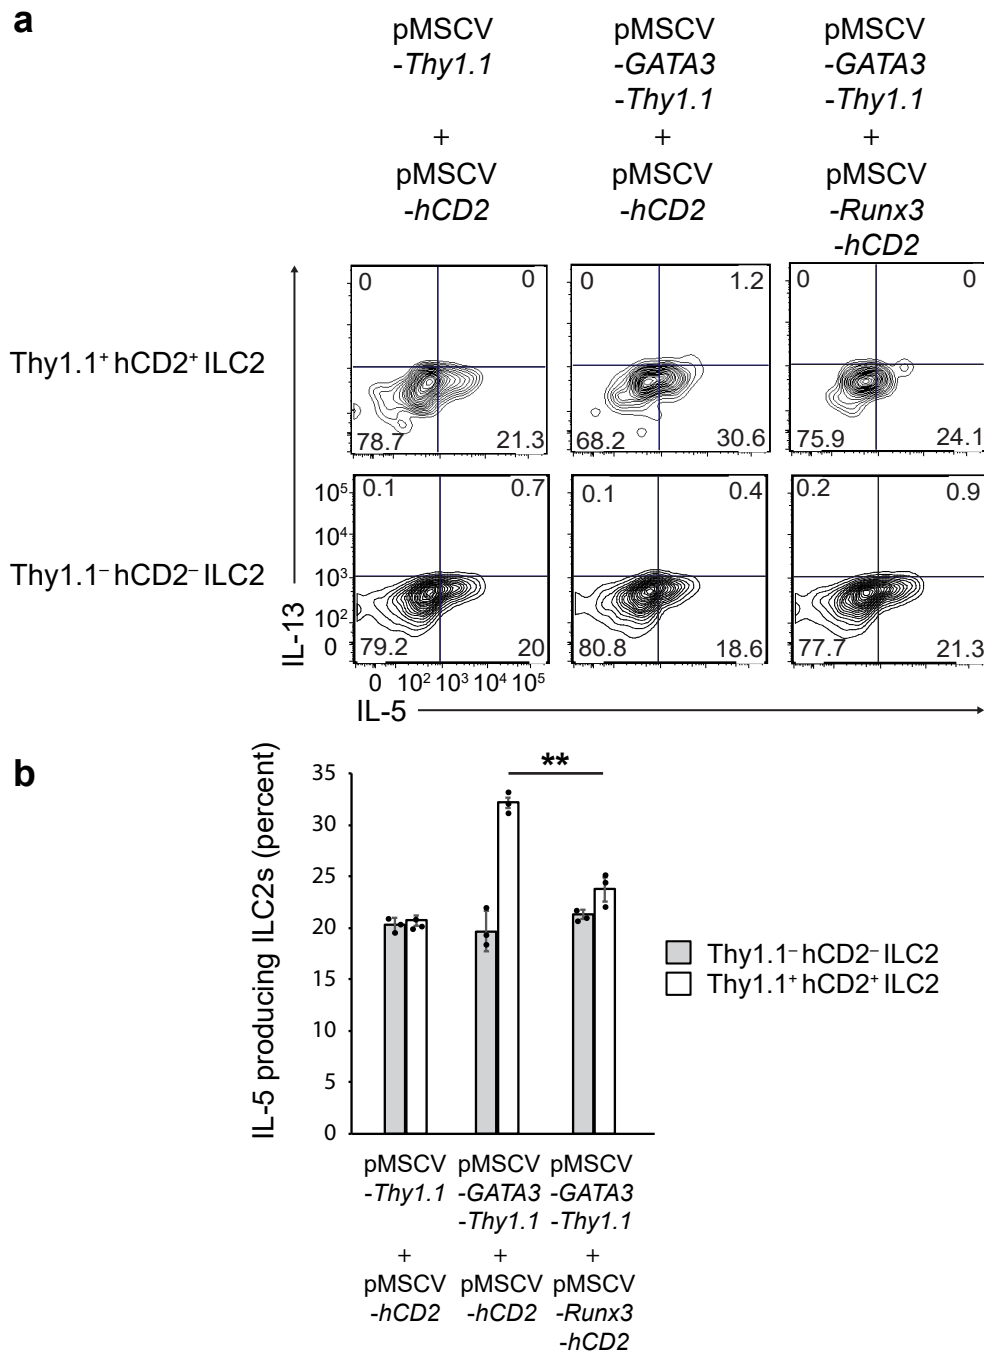

**Supplementary Figure 4.** Overexpression of GATA-3 enhances IL-5 production which is inhibited by Runx3. Host mice (CD45.1<sup>+</sup>) were lethally irradiated and reconstituted with CD45.2<sup>+</sup> bone marrow cells retrovirally transduced with the indicated vectors. Thy1.1 and hCD2 are surrogate markers for transduction. **a** Flow cytometry analyzing the expression of IL-5 and IL-13 by transduced Thy1.1<sup>+</sup> hCD2<sup>+</sup> (top) or undtransduced Thy1.1<sup>-</sup> hCD2<sup>-</sup> (bottom) donor CD45.2<sup>+</sup> ILC2s (CD45<sup>+</sup> CD3<sup>-</sup> CD19<sup>-</sup> CD127<sup>+</sup> CD25<sup>+</sup> KLRG1<sup>+</sup>) from the lung of the host mice. **b** Frequency of IL-5 producing cells in the indicated ILC2s, determined by flowcytometry as in **a**. Numbers indicate percent cells in each quadrant. In **b**, \*\**p* < 0.01 by Student's t-test. Data are representative of at least two independent experiments.

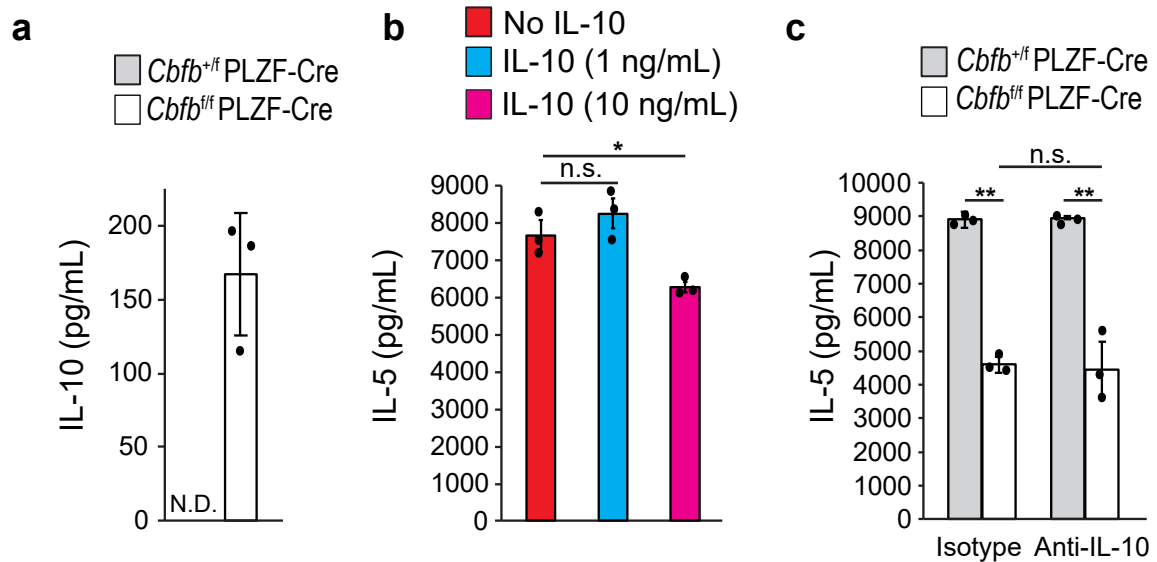

**Supplementary Figure 5.** IL-10 is not responsible for low reactivity of *Cbfb*-deficient ILC2s. Lung ILC2s (500 cells/well) of the indicated mice were cultured with IL-2 (10 ng/mL) and IL-33 (10 ng/mL) with or without indicated reagents for 4 days. **a** Concentration of IL-10 in the culture supernatant from the lung ILC2s of the indicated mice, analyzed by ELISA. **b** Concentration of IL-5 in the culture supernatant from the C57BL/6 lung ILC2s with the indicated concentration of IL-10, analyzed by ELISA. **c** Concentration of IL-5 in the culture supernatant from the indicated mouse ILC2s with isotype control antibody and anti-IL-10 neutralizing antibody (5  $\mu$ g/mL), analyzed by ELISA. In **b** and **c**, \* $p < 0.05$  and \*\* $p < 0.01$  by Student's t-test. Data are representative of at least two independent experiments [mean  $\pm$  s.d. of technical triplicates collected from three mice (a, b, c)].

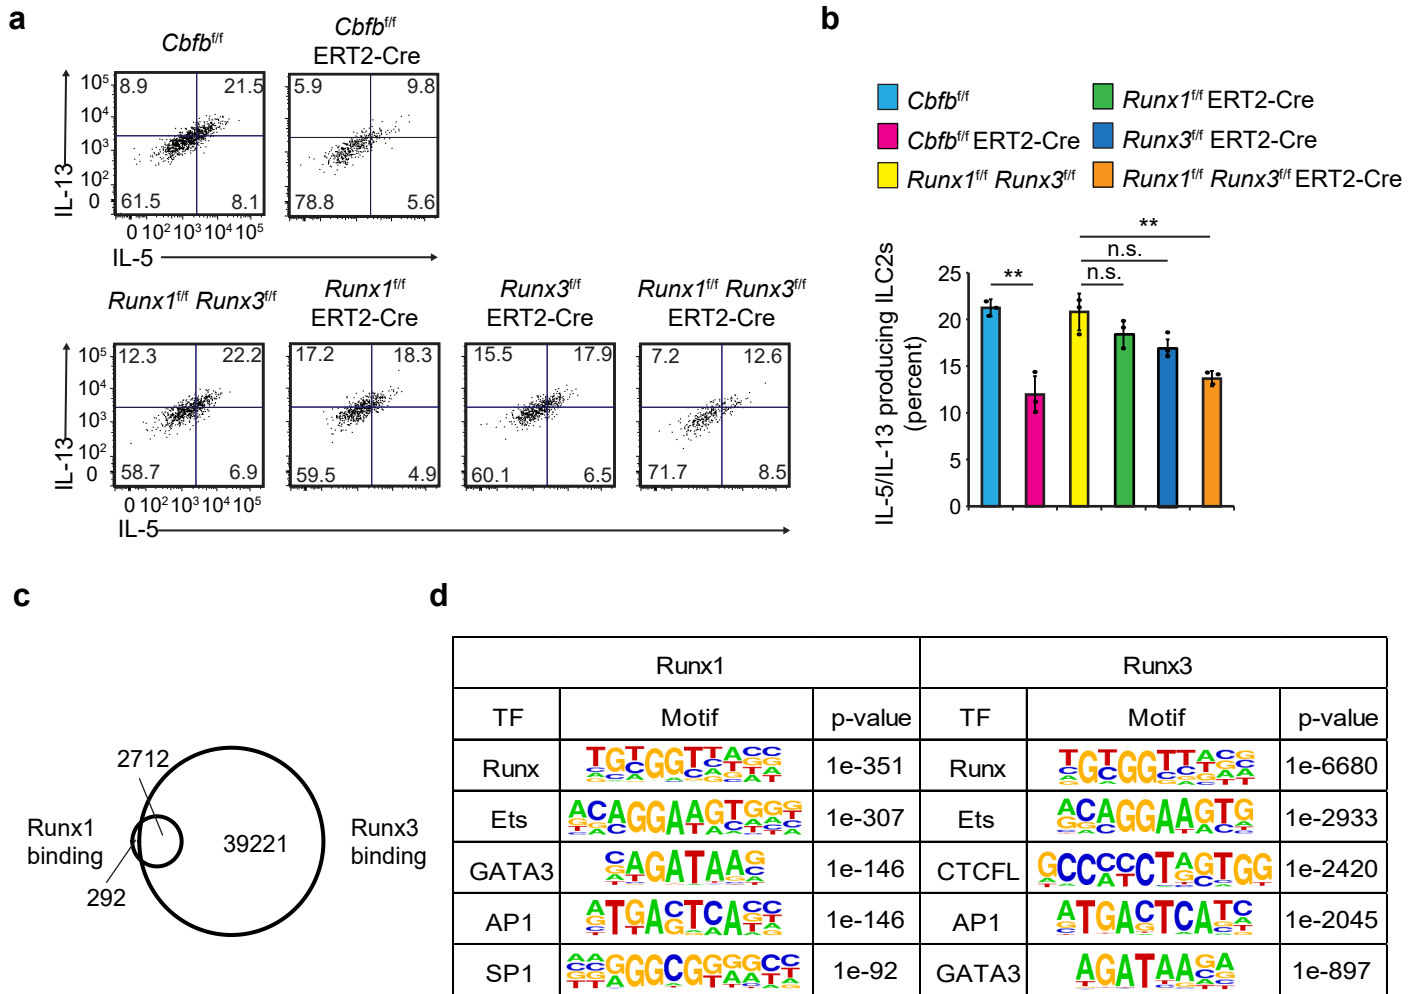

**Supplementary Figure 6.** Function of Runx1 and Runx3 for ILC2 reactivity against IL-33. **a** Flow cytometry analyzing production of IL-5 and IL-13 by ILC2 from small intestine of *Cbfb<sup>fl/fl</sup>* ERT2-Cre, *Runx1<sup>fl/fl</sup>* ERT2-Cre, *Runx3<sup>fl/fl</sup>* ERT2-Cre, and *Runx1<sup>fl/fl</sup> Runx3<sup>fl/fl</sup>* ERT2-Cre mice treated with tamoxifen in response to IL-2 and IL-33. **b** Frequency of IL-5/IL-13-producing cells in the indicated ILC2s, cultured and determined by flow cytometry as in **a**. **c** Venn graph showing number of Runx1 binding peaks (left) and Runx3 binding peaks (right) in ILC2s cultured with IL-2, IL-7, and IL-33 *in vitro*, determined by ChIP sequence analysis. **d** Motif analysis of Runx1 or Runx3 binding peaks shown in **c**. In **b**,  $**p < 0.01$  by Student's t-test. Data are representative of two independent (mean  $\pm$  s.d. of three mice in **b**).

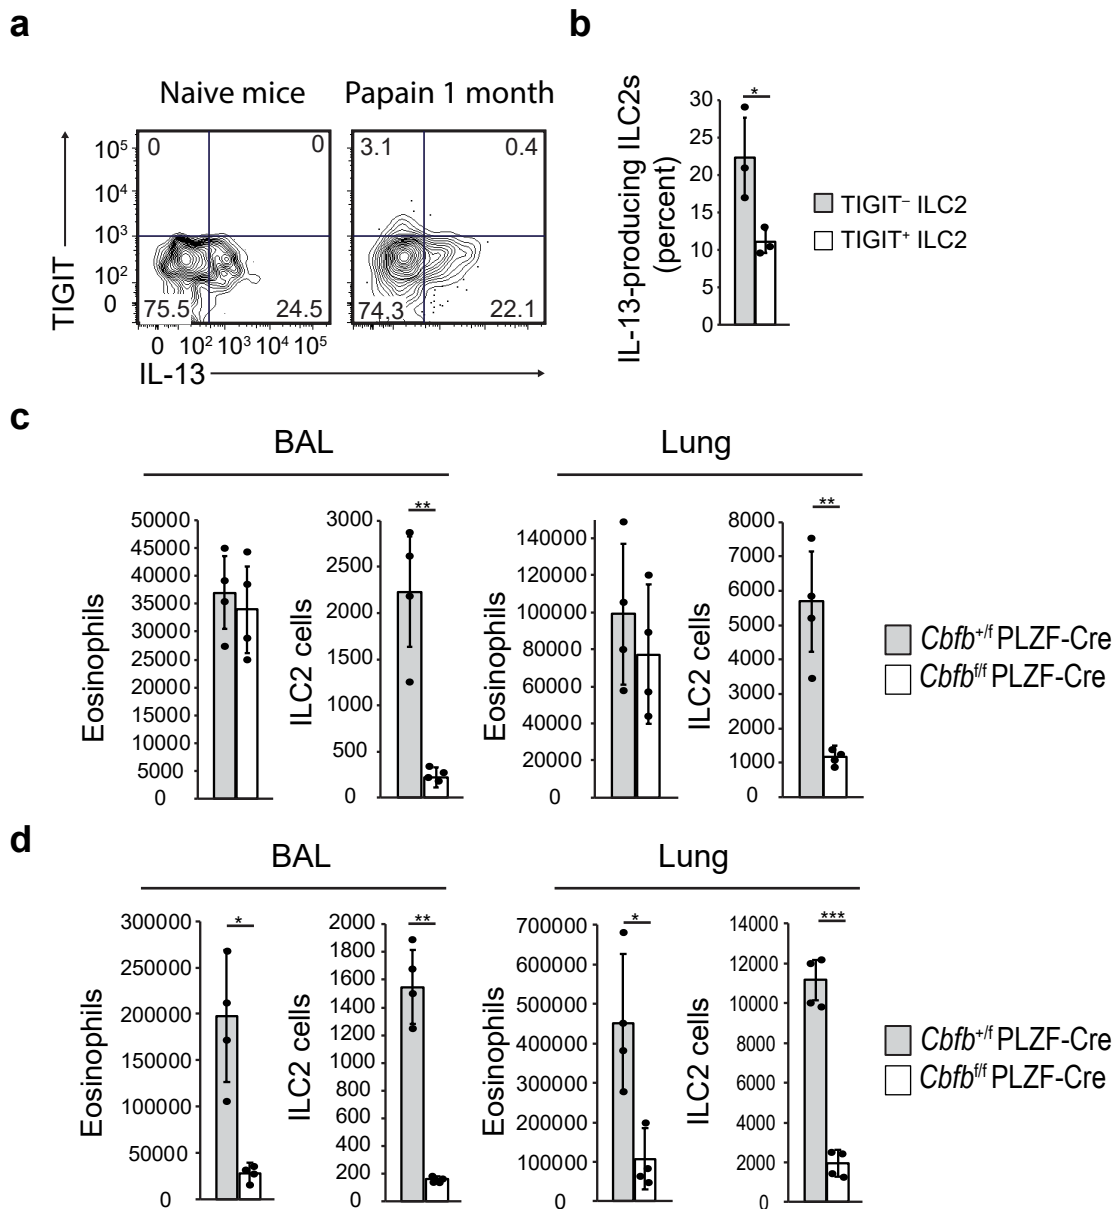

**Supplementary Figure 7.** Physiological roles of exhausted-like phenomenon of ILC2s in chronic allergy. **a, b** C57BL/6 mice were intranasally administered with 100 ug of papain every 3 day for a month and the lung ILC2s (CD45<sup>+</sup> CD3<sup>-</sup> CD19<sup>-</sup> NK1.1<sup>-</sup> CD11b<sup>-</sup> Gr1<sup>-</sup> Ter119<sup>-</sup> CD127<sup>+</sup> CD25<sup>+</sup> KLRG1<sup>+</sup>) were stimulated with 50 ng/mL PMA and 500 ng/mL Ionomycin for 4 hours in the presence of GoldiPlug. **a** Flow cytometry analyzing production of IL-13 by the TIGIT<sup>+</sup> or TIGIT<sup>-</sup> ILC2s from the indicated mice. **b** Frequency of IL-13-producing ILC2s determined as in **a**. **c, d** Irradiated CD45.1<sup>+</sup> congenic mice were adoptively transferred with bone marrow cells of either *Cbfb*<sup>+/-</sup> PLZF-Cre or *Cbfb*<sup>fl/fl</sup> PLZF-Cre mice and were treated with papain every 3 days at 12-20 weeks after transfer for a month (**c**), or 3 times every 3 days in the first week followed by 3 times every 3 days in the 4th week after a rest of two weeks (**d**). On the day following the last papain treatment, eosinophils (CD45<sup>+</sup> CD11c<sup>-</sup> Siglec F<sup>+</sup>) and ILC2s in the BAL fluid and lung were determined. Bar graphs indicate absolute numbers of eosinophils and ILC2s in the BAL and the lung from the indicated recipient mice. In **b, c**, and **d**, \**p* < 0.05, \*\**p* < 0.01 and, \*\*\**p* < 0.001 by Student's t-test. Data are representative of two independent experiments (mean ± s.d. of three mice in **b** and four mice in **c, d**).



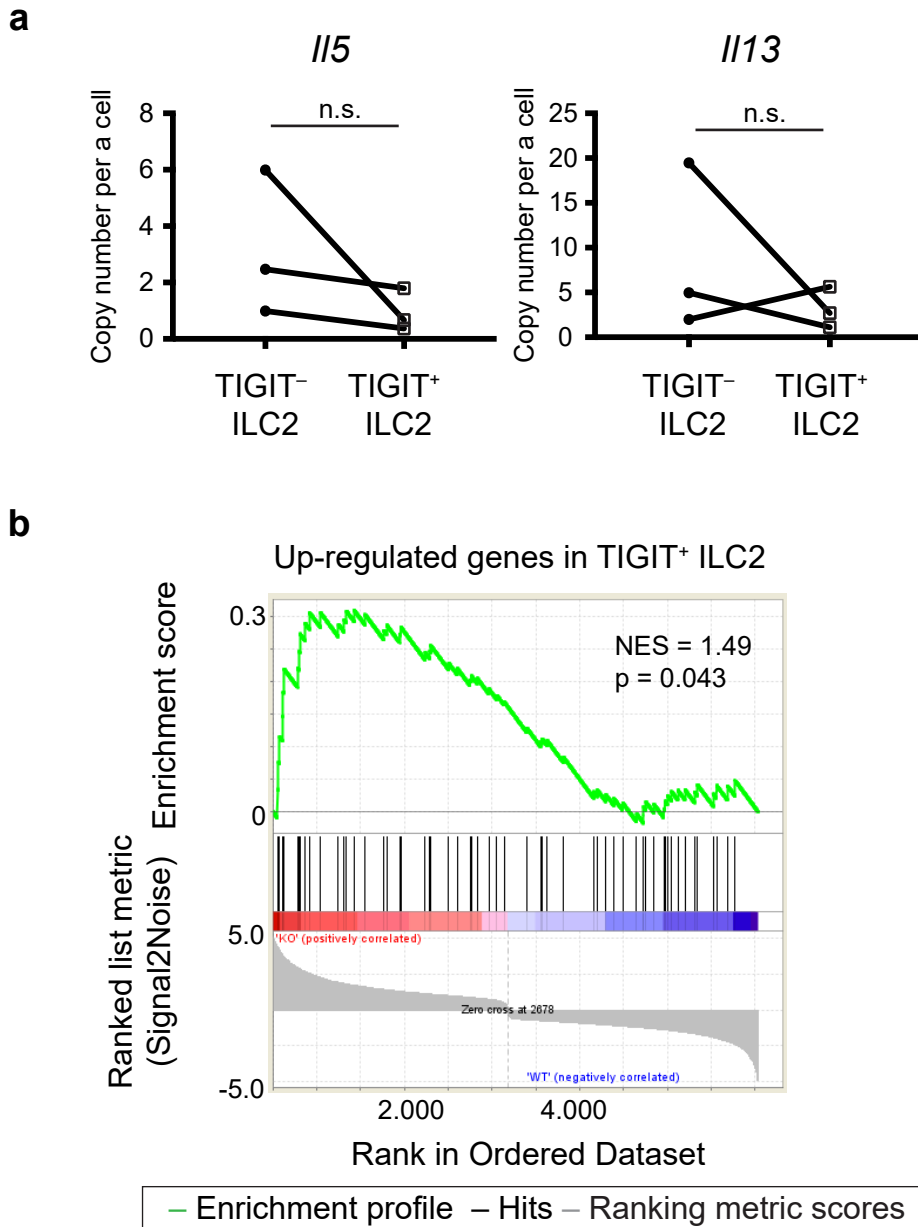

**Supplementary Figure 8.** TIGIT<sup>+</sup> ILC2s in the BAL resemble *Cbfβ*-deficient ILC2s. C57BL/6 mice were intranasally inoculated with 100 ug of papain on day 0, 3, and 6. On day 7, one hundred of TIGIT<sup>-</sup> and TIGIT<sup>+</sup> ILC2s were sorted from BAL fluid for RNA sequence analysis with cDNA barcoding. **a** Copy number per a cell of indicated gene mRNA expression. n.s.; not significant. **b** Gene set enrichment analysis of differentially expressed genes in TIGIT<sup>+</sup> ILC2s vs. TIGIT<sup>-</sup> ILC2s performed on differentially expressed genes in IL-33-stimulated *Cbfβ*<sup>fl/fl</sup> PLZF-Cre ILC2s vs. *Cbfβ*<sup>+/+</sup> PLZF-Cre ILC2s *in vitro* as described in Fig.4i. Data are representative of two independent experiments.

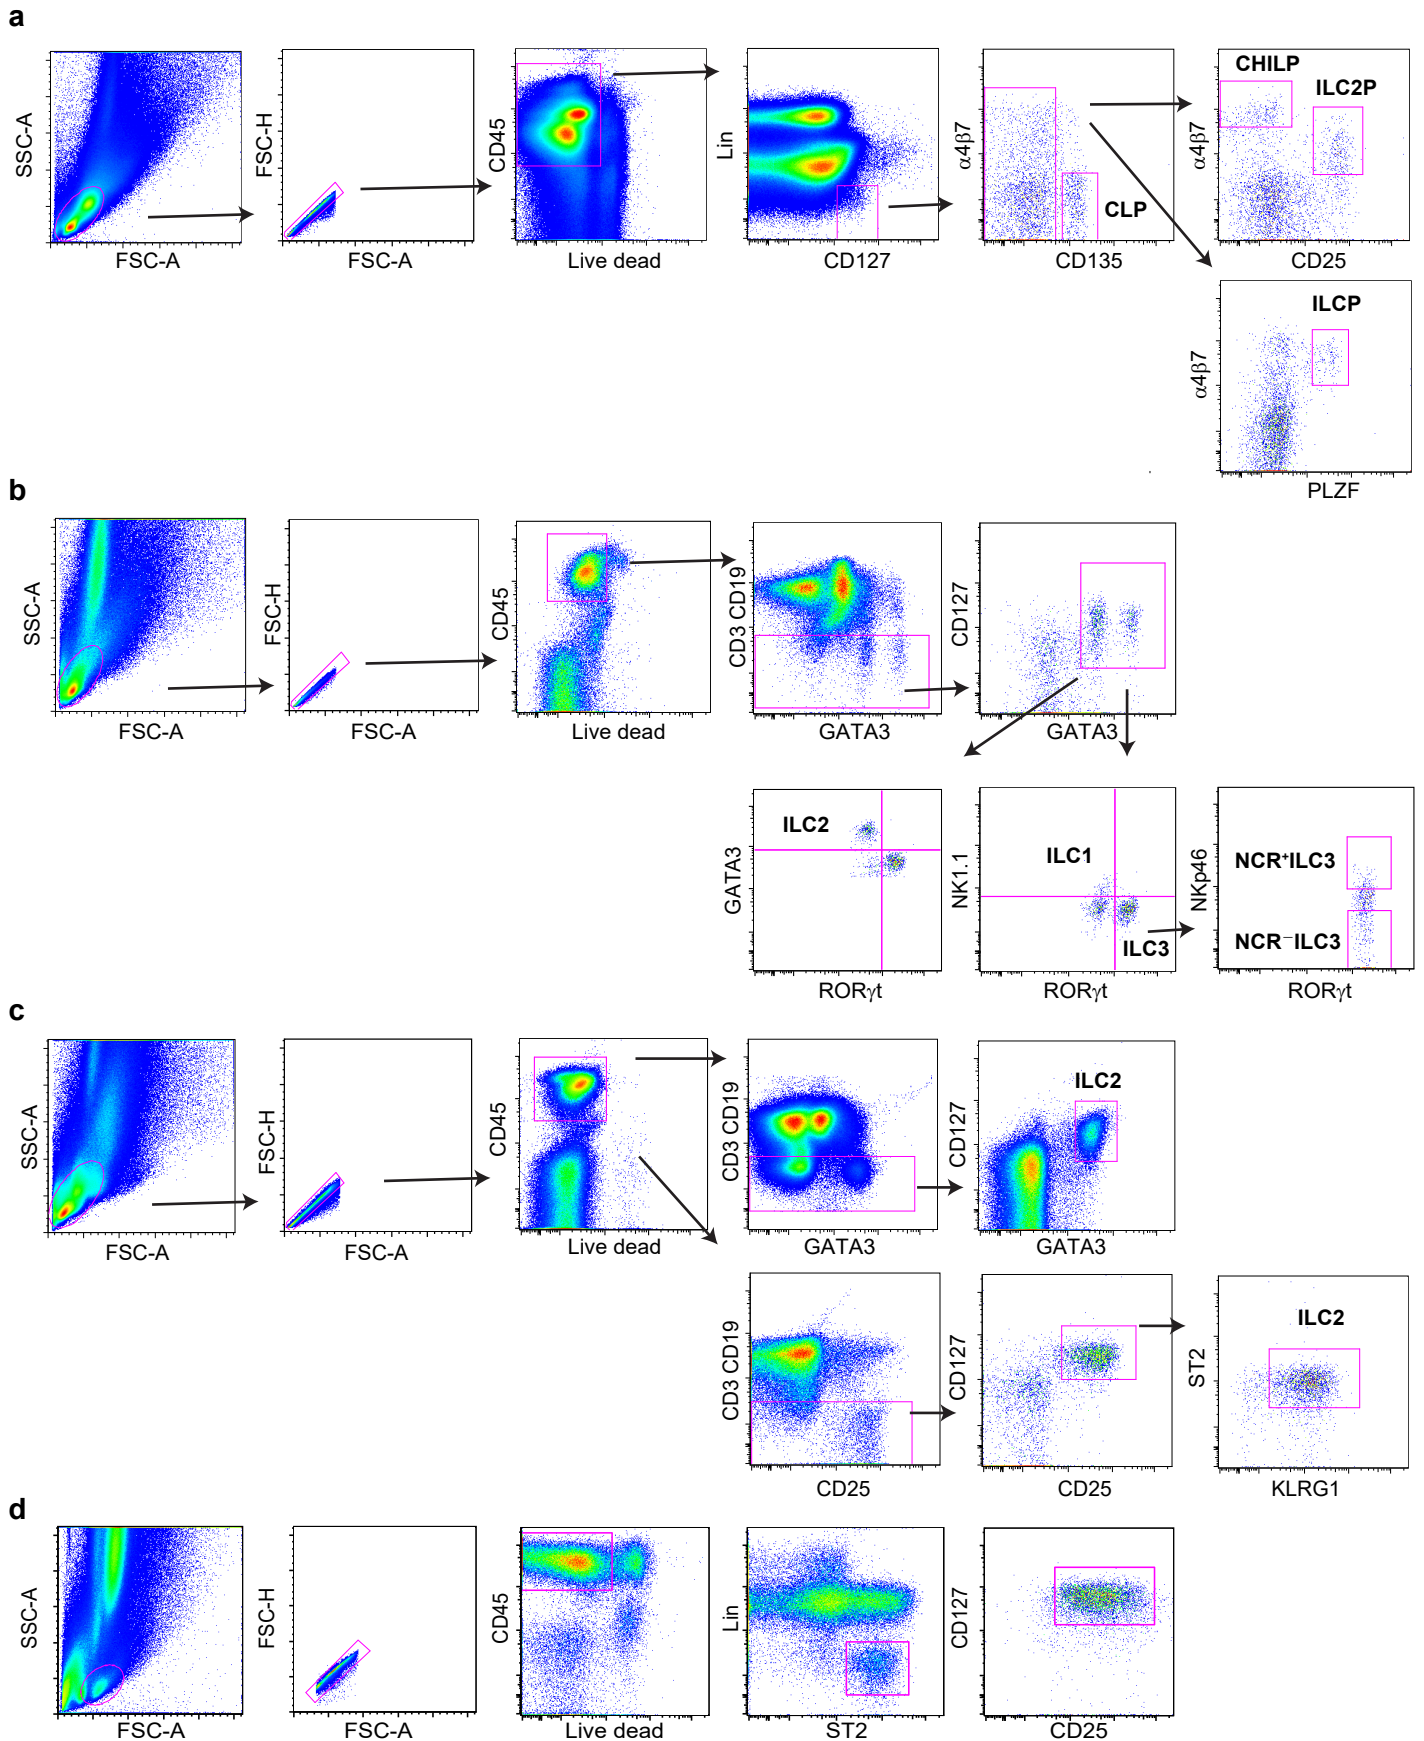

**Supplementary Figure 9.** Gating strategies used for cell sorting or phenotypical examination. **a** Gating strategy for CLPs, CHILPs, ILCPs, and ILC2Ps in the bone marrow presented on Fig. 1. **b** Gating strategy for ILC1s, ILC2s, NCR<sup>+</sup> ILC3s, and NCR<sup>-</sup> ILC3s in the small intestine presented on Fig. 1 and 2. **c** Gating strategy for ILC2s in the lung presented on Fig. 1, 2, 3, 4, 5, 6, 7, 8, and 9. **d** Gating strategy for ILC2s in the BAL fluid presented on Fig. 7, 8, and 9.

**Supplementary Table 1. List of antibodies used in this study.**

| <b>Antibody</b>                | <b>Clone name</b> | <b>Company</b> |
|--------------------------------|-------------------|----------------|
| Anti-CD3 mAb                   | 145-2C11          | eBioscience    |
| Anti-CD19 mAb                  | 1D3               | eBioscience    |
| Anti-CD25 mAb                  | PC61.5            | eBioscience    |
| Anti-KLRG1 mAb                 | 2F1               | eBioscience    |
| Anti-CD127 mAb                 | A7R34             | eBioscience    |
| Anti-RORyt mAb                 | B2D               | eBioscience    |
| Anti-CD4 mAb                   | GK1.5             | eBioscience    |
| Anti-NKp46 mAb                 | 29A1.4            | eBioscience    |
| Anti-NK1.1 mAb                 | PK136             | eBioscience    |
| Anti-Gr-1 mAb                  | RB6-8C5           | eBioscience    |
| Anti-CD11b mAb                 | M1/70             | eBioscience    |
| Anti-CD8a mAb                  | 53-6.7            | eBioscience    |
| Anti-Ter-119 mAb               | Ly76              | eBioscience    |
| Anti-c-kit mAb                 | 2B8               | eBioscience    |
| Anti-sca-1 mAb                 | D7                | eBioscience    |
| Anti-CD135 mAb                 | A2F10             | eBioscience    |
| Anti-PLZF mAb                  | 9E12              | eBioscience    |
| Anti- $\alpha$ 4 $\beta$ 7 mAb | DATK32            | eBioscience    |
| Anti-GATA-3 mAb                | TWAJ              | eBioscience    |
| Anti-CD45.1 mAb                | A20               | eBioscience    |
| Anti-CD45.2 mAb                | 104               | eBioscience    |
| Anti-CD49b mAb                 | DX5               | eBioscience    |
| Anti-CD49a mAb                 | Ha31/8            | BD Bioscience  |
| Anti-Fc $\epsilon$ RI mAb      | MAR-1             | eBioscience    |
| Anti-IgE mAb                   | R35-72            | BD Bioscience  |
| Anti-CD11c mAb                 | N418              | eBioscience    |
| Anti-IL-25R mAb                | MUNC33            | eBioscience    |
| Anti-ST2 (IL33R) mAb           | RMST2-2           | eBioscience    |
| Anti-Thy1.2 mAb                | 53-2.1            | eBioscience    |
| Anti-Thy1.1 mAb                | HIS51             | eBioscience    |
| Anti-IL-5 mAb                  | TRFK5             | eBioscience    |
| Anti-IL-13 mAb                 | eBio13A           | eBioscience    |
| Anti-TIGIT mAb                 | GIGD7             | eBioscience    |
| Anti-IL-10 mAb                 | JES5-16E3         | eBioscience    |
| Anti-CD16/32 mAb               | 2.4g2             | Bay Bioscience |
| Anti-Ki67 mAb                  | Sola15            | eBioscience    |
| Anti-GITR mAb                  | DTA-1             | eBioscience    |
| Anti-PD1 mAb                   | RMP1-30           | eBioscience    |

**Supplementary Table 2. List of primers used in this study.**

| Gene or transcript name              | Forward primer                | Reverse primer                 |
|--------------------------------------|-------------------------------|--------------------------------|
| PCR primers                          |                               |                                |
| <i>Cbfb</i> gene (floxed region)     | 5'- GGTTAGGAGTCATTGTGATCA -3' | 5'- CCTCCTCATTCTAACAGGAATC -3' |
| qPCR primer                          |                               |                                |
| <i>Cbfb</i> gene (unfloxed region)   | 5'- CCATCTCCAGTCCCAAGAAT -3'  | 5'- AGCATTGTTGATGCTTCCAG -3'   |
| <i>Cbfb</i> gene (floxed region)     | 5'- CGAGACCCTCACTCCAAAAT -3'  | 5'- GGAAAGAATCCAACCGAAGA -3'   |
| <i>Il10</i> promoter                 | 5'- GAAGAAAATCAGCCCTCTCG -3'  | 5'- CGTCCGATATTTCTTGCTGA -3'   |
| RT-PCR primers                       |                               |                                |
| <i>Cbfb</i> with or without mutation | 5'- AACACCTAGCCGGGAATATG -3'  | 5'- GGTCGCCCAATGAGTTATTT -3'   |
| qRT-PCR primers                      |                               |                                |
| <i>Cbfb</i> (unfloxed region)        | 5'- CCAGACACGCTTCCAGAAC -3'   | 5'- CATATTCCCGGCTAGGTGTT -3'   |
| <i>Cbfb</i> (floxed region)          | 5'- GTATGGGTTGCCTGGAGTTT -3'  | 5'- TCAAAGGCCTGTTGTGCTAA -3'   |
| <i>Il5</i>                           | 5'- TGGAGATTCCCATGAGCAC -3'   | 5'- AGGGACAGGAAGCCTCATC -3'    |
| <i>Il13</i>                          | 5'- GGATATTGCATGGCCTCTG -3'   | 5'- GGCGAAACAGTTGCTTTGT -3'    |
| <i>Il10</i>                          | 5'- TTGAATTCCCTGGGTGAGA -3'   | 5'- GGCCTTGTAGACACCTTGG -3'    |
| <i>tigit</i>                         | 5'- GTGCTGGGACTCATTTGCT -3'   | 5'- GTTCTCCCAAGGCCACTTT -3'    |
| <i>Actb</i>                          | 5'- CCTGGCACCCAGCACAAAT -3'   | 5'- GCCGATCCACACGGAGTACT -3'   |
