# Supplementary material for: Runx/Cbfβ complexes protect group 2 innate lymphoid cells from exhausted-like hyporesponsiveness during allergic airway inflammation
Source: PubMed Central journal article supplement (PMC6347616; doi:10.1038/s41467-019-08365-0), 2019-01-25
Supplement: 41467_2019_8365_MOESM2_ESM.pdf [file 41467_2019_8365_MOESM2_ESM.pdf]

## **Description of Additional Supplementary Files**

### Supplementary Data 1

List of genes regulated by GATA-3 and Cbfb in steady-state ILC2s.

### Supplementary Data 2

List of genes regulated by Cbfb in ILC2s activated with IL-33.

### Supplementary Data 3

List of genes differentially expressed in TIGIT+ ILC2s compared to TIGIT- ILC2s.
