# Supplementary material for: Runx/Cbfβ complexes protect group 2 innate lymphoid cells from exhausted-like hyporesponsiveness during allergic airway inflammation
Source: PubMed Central journal article supplement (PMC6347616; doi:10.1038/s41467-019-08365-0), 2019-01-25
Supplement: 41467_2019_8365_MOESM6_ESM.pdf [file 41467_2019_8365_MOESM6_ESM.pdf]

## Reporting Summary

Nature Research wishes to improve the reproducibility of the work that we publish. This form provides structure for consistency and transparency in reporting. For further information on Nature Research policies, see [Authors & Referees](#) and the [Editorial Policy Checklist](#).

### Statistics

For all statistical analyses, confirm that the following items are present in the figure legend, table legend, main text, or Methods section.

n/a Confirmed

- The exact sample size ( $n$ ) for each experimental group/condition, given as a discrete number and unit of measurement
- A statement on whether measurements were taken from distinct samples or whether the same sample was measured repeatedly
- The statistical test(s) used AND whether they are one- or two-sided  
*Only common tests should be described solely by name; describe more complex techniques in the Methods section.*
- A description of all covariates tested
- A description of any assumptions or corrections, such as tests of normality and adjustment for multiple comparisons
- A full description of the statistical parameters including central tendency (e.g. means) or other basic estimates (e.g. regression coefficient) AND variation (e.g. standard deviation) or associated estimates of uncertainty (e.g. confidence intervals)
- For null hypothesis testing, the test statistic (e.g.  $F$ ,  $t$ ,  $r$ ) with confidence intervals, effect sizes, degrees of freedom and  $P$  value noted  
*Give  $P$  values as exact values whenever suitable.*
- For Bayesian analysis, information on the choice of priors and Markov chain Monte Carlo settings
- For hierarchical and complex designs, identification of the appropriate level for tests and full reporting of outcomes
- Estimates of effect sizes (e.g. Cohen's  $d$ , Pearson's  $r$ ), indicating how they were calculated

*Our web collection on [statistics for biologists](#) contains articles on many of the points above.*

### Software and code

Policy information about [availability of computer code](#)

Data collection

N/A

Data analysis

N/A

For manuscripts utilizing custom algorithms or software that are central to the research but not yet described in published literature, software must be made available to editors/reviewers. We strongly encourage code deposition in a community repository (e.g. GitHub). See the Nature Research [guidelines for submitting code & software](#) for further information.

### Data

Policy information about [availability of data](#)

All manuscripts must include a [data availability statement](#). This statement should provide the following information, where applicable:

- Accession codes, unique identifiers, or web links for publicly available datasets
- A list of figures that have associated raw data
- A description of any restrictions on data availability

RNA sequence and ChIP sequence data were all deposited to NCBI. The accession code is GSE111871.

### Field-specific reporting

Please select the one below that is the best fit for your research. If you are not sure, read the appropriate sections before making your selection.

- Life sciences       Behavioural & social sciences       Ecological, evolutionary & environmental sciences

For a reference copy of the document with all sections, see [nature.com/documents/nr-reporting-summary-flat.pdf](https://nature.com/documents/nr-reporting-summary-flat.pdf)

## Life sciences study design

All studies must disclose on these points even when the disclosure is negative.

|                 |                                                                         |
|-----------------|-------------------------------------------------------------------------|
| Sample size     | Sample size was selected to ensure an alpha value of 0.05.              |
| Data exclusions | No such exclusion in this paper.                                        |
| Replication     | All experiments described in this paper have been done more than twice. |
| Randomization   | No randomization was used for animal studies.                           |
| Blinding        | Blinding test was done for scoring of histology.                        |

## Reporting for specific materials, systems and methods

We require information from authors about some types of materials, experimental systems and methods used in many studies. Here, indicate whether each material, system or method listed is relevant to your study. If you are not sure if a list item applies to your research, read the appropriate section before selecting a response.

### Materials & experimental systems

| n/a                                 | Involved in the study                                           |
|-------------------------------------|-----------------------------------------------------------------|
| <input type="checkbox"/>            | <input checked="" type="checkbox"/> Antibodies                  |
| <input checked="" type="checkbox"/> | <input type="checkbox"/> Eukaryotic cell lines                  |
| <input checked="" type="checkbox"/> | <input type="checkbox"/> Palaeontology                          |
| <input type="checkbox"/>            | <input checked="" type="checkbox"/> Animals and other organisms |
| <input checked="" type="checkbox"/> | <input type="checkbox"/> Human research participants            |
| <input checked="" type="checkbox"/> | <input type="checkbox"/> Clinical data                          |

### Methods

| n/a                                 | Involved in the study                              |
|-------------------------------------|----------------------------------------------------|
| <input type="checkbox"/>            | <input checked="" type="checkbox"/> ChIP-seq       |
| <input type="checkbox"/>            | <input checked="" type="checkbox"/> Flow cytometry |
| <input checked="" type="checkbox"/> | <input type="checkbox"/> MRI-based neuroimaging    |

## Antibodies

|                 |                                |
|-----------------|--------------------------------|
| Antibodies used | Described in Material section. |
| Validation      | Described in Material section. |

## Animals and other organisms

Policy information about [studies involving animals](#); [ARRIVE guidelines](#) recommended for reporting animal research

|                         |                                                                          |
|-------------------------|--------------------------------------------------------------------------|
| Laboratory animals      | Mice, C57BL/6, Females. Recipients of bone marrow cells were 20-25w old. |
| Wild animals            | N/A                                                                      |
| Field-collected samples | N/A                                                                      |
| Ethics oversight        | the Institutional Animal Care and Use Committee of RIKEN Yokohama Branch |

Note that full information on the approval of the study protocol must also be provided in the manuscript.

## ChIP-seq

### Data deposition

- Confirm that both raw and final processed data have been deposited in a public database such as [GEO](#).
- Confirm that you have deposited or provided access to graph files (e.g. BED files) for the called peaks.

|                                                                    |                                                                                                                                         |
|--------------------------------------------------------------------|-----------------------------------------------------------------------------------------------------------------------------------------|
| Data access links<br><i>May remain private before publication.</i> | <a href="https://www.ncbi.nlm.nih.gov/geo/query/acc.cgi?acc=GSE111871">https://www.ncbi.nlm.nih.gov/geo/query/acc.cgi?acc=GSE111871</a> |
| Files in database submission                                       | All ChIP sequence data and wig files calculated from the raw data.                                                                      |
| Genome browser session<br>(e.g. <a href="#">UCSC</a> )             | No longer applicable                                                                                                                    |

## Methodology

|                         |                                                                                |
|-------------------------|--------------------------------------------------------------------------------|
| Replicates              | Two technical replicates                                                       |
| Sequencing depth        | Total reads are between 10 to 20 million. More than 95 % of reads were mapped. |
| Antibodies              | Described in Material section.                                                 |
| Peak calling parameters | MACS2 was used with default settings for peak calling.                         |
| Data quality            | More than 3000 peaks were at 5% FDR and above 4-fold enrichment.               |
| Software                | Described in Material section.                                                 |

## Flow Cytometry

### Plots

Confirm that:

- The axis labels state the marker and fluorochrome used (e.g. CD4-FITC).
- The axis scales are clearly visible. Include numbers along axes only for bottom left plot of group (a 'group' is an analysis of identical markers).
- All plots are contour plots with outliers or pseudocolor plots.
- A numerical value for number of cells or percentage (with statistics) is provided.

### Methodology

|                           |                                                                                               |
|---------------------------|-----------------------------------------------------------------------------------------------|
| Sample preparation        | Described in Methods section.                                                                 |
| Instrument                | BD FACS Canto II                                                                              |
| Software                  | Flowjo v9.9.4                                                                                 |
| Cell population abundance | More than 98% determined by post sort analysis.                                               |
| Gating strategy           | Definition of the cell population and brief gating strategy were described in Figure legends. |

- Tick this box to confirm that a figure exemplifying the gating strategy is provided in the Supplementary Information.
